# Supplementary material for: Occurrence of Alternaria and Other Toxins in Cereal Grains Intended for Animal Feeding Collected in Slovenia: A Three-Year Study
Source: MDPI journal article supplement (doi:10.3390/toxins13050304), 2021-04-24
Supplement: s1 [file s1]

# Supplementary Materials: Occurrence of *Alternaria* and Other Toxins in Cereal Grains Intended for Animal Feeding Collected in Slovenia: A Three-Year Study

Janja Babič, Gabrijela Tavčar-Kalcher, Franci Aco Celar, Katarina Kos, Tanja Knific and Breda Jako-vac-Strajn

**Table S1.** The occurrence of *Alternaria* and *Fusarium* mycotoxins by year.

| Yearly Descriptive Statistics | TeA    | TEN   | AOH     | AME     | DON      | 3- and 15-AcDON | ZEN     | Total   |
|-------------------------------|--------|-------|---------|---------|----------|-----------------|---------|---------|
| 2014                          |        |       |         |         |          |                 |         |         |
| No. of samples                | 173    | 173   | 173     | 173     | 173      | 173             | 173     | 173     |
| No. of positive samples       | 67     | 5     | 20      | 21      | 42       | 0               | 14      | 93      |
| Incidence rate (%)            | 39     | 3     | 12      | 12      | 24       | 0               | 8       | 54      |
| Mean (µg/kg)                  | 106    | 23    | 113     | 124     | 440      | –               | 97      | 343     |
| Median (µg/kg)                | 59     | 21    | 45      | 39      | 299      | –               | 61      | 139     |
| 5th–95th percentile (µg/kg)   | 15–378 | 17–33 | 14–207  | 13–389  | 109–1340 | –               | 36–278  | 17–1338 |
| Max (µg/kg)                   | 666    | 35    | 1289    | 995     | 1860     | –               | 300     | 1860    |
| 2015                          |        |       |         |         |          |                 |         |         |
| No. of samples                | 124    | 124   | 124     | 124     | 124      | 124             | 124     | 124     |
| No. of positive samples       | 22     | 22    | 20      | 3       | 43       | 8               | 2       | 71      |
| Incidence rate (%)            | 18     | 18    | 16      | 2       | 35       | 6               | 2       | 57      |
| Mean (µg/kg)                  | 168    | 25    | 105     | 411     | 846      | 148             | 251     | 643     |
| Median (µg/kg)                | 52     | 25    | 42      | 78      | 604      | 89              | 251     | 296     |
| 5th–95th percentile (µg/kg)   | 14–889 | 15–37 | 16–295  | 39–1017 | 125–3204 | 46–392          | 239–262 | 22–2390 |
| Max (µg/kg)                   | 1053   | 42    | 959     | 1121    | 4082     | 491             | 263     | 4082    |
| 2016                          |        |       |         |         |          |                 |         |         |
| No. of samples                | 136    | 136   | 136     | 136     | 136      | 136             | 136     | 136     |
| No. of positive samples       | 23     | 9     | 8       | 3       | 52       | 0               | 6       | 69      |
| Incidence rate (%)            | 17     | 7     | 6       | 2       | 38       | 0               | 4       | 51      |
| Mean (µg/kg)                  | 359    | 34    | 383     | 54      | 666      | –               | 101     | 682     |
| Median (µg/kg)                | 219    | 20    | 84      | 31      | 398      | –               | 89      | 431     |
| 5th–95th percentile (µg/kg)   | 33–937 | 15–94 | 25–1492 | 27–98   | 105–2391 | –               | 62–149  | 30–2459 |
| Max (µg/kg)                   | 2277   | 116   | 1836    | 105     | 3504     | –               | 149     | 3504    |
| Total (2014–2016)             |        |       |         |         |          |                 |         |         |
| No. of samples                | 433    | 433   | 433     | 433     | 433      | 433             | 433     | 433     |
| No. of positive samples (%)   | 112    | 36    | 48      | 27      | 137      | 8               | 22      | 231     |
| Incidence rate (%)            | 26     | 8     | 11      | 6       | 32       | 2               | 5       | 53      |
| Mean (µg/kg)                  | 170    | 27    | 155     | 148     | 653      | 148             | 112     | 535     |
| Median (µg/kg)                | 78     | 24    | 44      | 39      | 363      | 89              | 78      | 275     |
| 5th–95th percentile (µg/kg)   | 16–558 | 15–47 | 14–922  | 15–813  | 110–2174 | 46–392          | 40–266  | 20–2098 |
| Max (µg/kg)                   | 2277   | 116   | 1836    | 1121    | 4082     | 436             | 300     | 4082    |

No.: number; Mean: the arithmetic mean of the positive samples; Median: the median concentration of the positive samples; Max: the maximum of the positive samples. DAS, HT-2, T-2, FB1 and FB2, and OTA are not included in table. They were detected in a single sample or not detected at all.

**Table S2.** The occurrence of *Alternaria* and *Fusarium* mycotoxins in cereals.

| Cereal Group                | TeA     | TEN     | AOH     | AME    | DON      | 3- and 15-AcDON | ZEN     | Total   |
|-----------------------------|---------|---------|---------|--------|----------|-----------------|---------|---------|
| Wheat                       |         |         |         |        |          |                 |         |         |
| No. of samples              | 181     | 181     | 181     | 181    | 181      | 181             | 181     | 181     |
| No. of positive samples     | 11      | 4       | 14      | 7      | 62       | 4               | 9       | 79      |
| Incidence rate (%)          | 6       | 2       | 8       | 4      | 34       | 2               | 5       | 44      |
| Mean (µg/kg)                | 42      | 28      | 39      | 34     | 705      | 97              | 77      | 584     |
| Median (µg/kg)              | 24      | 20      | 35      | 38     | 387      | 69              | 74      | 278     |
| 5th–95th percentile (µg/kg) | 16–109  | 14–55   | 14–73   | 13–60  | 112–2145 | 46–189          | 35–132  | 23–2091 |
| Max (µg/kg)                 | 154     | 61      | 78      | 69     | 4082     | 207             | 149     | 4082    |
| Barley                      |         |         |         |        |          |                 |         |         |
| No. of samples              | 107     | 107     | 107     | 107    | 107      | 107             | 107     | 107     |
| No. of positive samples     | 13      | 0       | 4       | 0      | 18       | 0               | 3       | 32      |
| Incidence rate (%)          | 12      | 0       | 4       | 0      | 17       | 0               | 3       | 30      |
| Mean (µg/kg)                | 187     | –       | 31      | –      | 521      | –               | 181     | 390     |
| Median (µg/kg)              | 37      | –       | 33      | –      | 329      | –               | 238     | 134     |
| 5th–95th percentile (µg/kg) | 14–971  | –       | 16–44   | –      | 100–1542 | –               | 60–263  | 15–1236 |
| Max (µg/kg)                 | 1053    | –       | 44      | –      | 1573     | –               | 266     | 1573    |
| Triticale                   |         |         |         |        |          |                 |         |         |
| No. of samples              | 81      | 81      | 81      | 81     | 81       | 81              | 81      | 81      |
| No. of positive samples     | 41      | 21      | 8       | 3      | 36       | 0               | 5       | 63      |
| Incidence rate (%)          | 51      | 26      | 10      | 4      | 44       | 0               | 6       | 78      |
| Mean (µg/kg)                | 101     | 26      | 58      | 52     | 784      | –               | 147     | 544     |
| Median (µg/kg)              | 78      | 25      | 46      | 23     | 471      | –               | 147     | 335     |
| 5th–95th percentile (µg/kg) | 18–286  | 15–37   | 13–131  | 19–106 | 156–2585 | –               | 54–271  | 21–1818 |
| Max (µg/kg)                 | 397     | 42      | 150     | 115    | 3720     | –               | 300     | 3720    |
| Rye                         |         |         |         |        |          |                 |         |         |
| No. of samples              | 31      | 31      | 31      | 31     | 31       | 31              | 31      | 31      |
| No. of positive samples     | 25      | 8       | 12      | 5      | 14       | 0               | 4       | 29      |
| Incidence rate (%)          | 81      | 26      | 39      | 16     | 45       | 0               | 13      | 94      |
| Mean (µg/kg)                | 181     | 20      | 75      | 29     | 288      | –               | 58      | 345     |
| Median (µg/kg)              | 132     | 18      | 82      | 28     | 204      | –               | 61      | 239     |
| 5th–95th percentile (µg/kg) | 27–507  | 15–31   | 27–115  | 25–34  | 115–546  | –               | 42–70   | 39–892  |
| Max (µg/kg)                 | 666     | 35      | 116     | 35     | 564      | –               | 71      | 666     |
| Spelt                       |         |         |         |        |          |                 |         |         |
| No. of samples              | 18      | 18      | 18      | 18     | 18       | 18              | 18      | 18      |
| No. of positive samples     | 10      | 1       | 5       | 8      | 6        | 2               | 0       | 17      |
| Incidence rate (%)          | 56      | 6       | 28      | 44     | 33       | 11              | 0       | 94      |
| Mean (µg/kg)                | 497     | 116     | 569     | 248    | 652      | 324             | –       | 851     |
| Median (µg/kg)              | 203     | 116     | 99      | 105    | 180      | 324             | –       | 427     |
| 5th–95th percentile (µg/kg) | 34–1692 | 116–116 | 21–1640 | 48–783 | 117–2368 | 173–474         | –       | 97–2708 |
| Max (µg/kg)                 | 2277    | 116     | 1836    | 995    | 3084     | 491             | –       | 3084    |
| Oats                        |         |         |         |        |          |                 |         |         |
| No. of samples              | 15      | 15      | 15      | 15     | 15       | 15              | 15      | 15      |
| No. of positive samples     | 12      | 12      | 5       | 4      | 1        | 2               | 1       | 13      |
| Incidence rate (%)          | 80      | 80      | 33      | 27     | 7        | 13              | 7       | 87      |
| Mean (µg/kg)                | 210     | 23      | 514     | 372    | 264      | 75              | 263     | 562     |
| Median (µg/kg)              | 178     | 23      | 260     | 171    | 264      | 75              | 263     | 297     |
| 5th–95th percentile (µg/kg) | 24–474  | 19–26   | 23–1223 | 35–992 | 264–264  | 61–88           | 263–263 | 23–1972 |
| Max (µg/kg)                 | 545     | 26      | 1289    | 1121   | 264      | 90              | 263     | 1289    |
| Total                       |         |         |         |        |          |                 |         |         |
| No. of samples              | 433     | 433     | 433     | 433    | 433      | 433             | 433     | 433     |
| No. of positive samples     | 112     | 36      | 48      | 27     | 137      | 8               | 22      | 231     |
| Incidence rate (%)          | 26      | 8       | 21      | 6      | 32       | 2               | 5       | 53      |
| Mean (µg/kg)                | 170     | 27      | 155     | 148    | 653      | 148             | 112     | 535     |
| Median (µg/kg)              | 78      | 24      | 44      | 39     | 363      | 89              | 78      | 275     |
| 5th–95th percentile (µg/kg) | 16–558  | 15–47   | 14–922  | 15–813 | 110–2174 | 46–392          | 40–266  | 20–2098 |
| Max (µg/kg)                 | 2277    | 116     | 1836    | 1121   | 4082     | 436             | 300     | 4082    |

No.: number; Mean: the arithmetic mean of the positive samples; Median: the median concentration of the positive samples; Max: the maximum concentration of the positive samples.
